# Supplementary material for: Preparation of a high-coordinated-silicon-centered spiro-cyclic compound
Source: Royal Society of Chemistry journal article supplement (doi:10.1039/d4dt00627e), 2024-01-01
Supplement: d4dt00627e1.pdf [file d4dt00627e1.pdf]

## Supporting Information

### Preparation of a High-coordinated-silicon-centered Spiro-cyclic Compound

Saroj Kumar Kushvaha<sup>[a]</sup>, Sai Manoj N. V. T. Gorantla<sup>[b]</sup>, Paula Kallenbach<sup>[a]</sup>, Regine Herbst-Irmer<sup>[a]</sup>, Dietmar Stalke<sup>\*[a]</sup>, Herbert W. Roesky<sup>\*[a]</sup>

#### 1. Materials and methods

All the chemicals were purchased from commercially available sources and were used as received. The solvents were dried by stirring over Na-K alloy for several days. All manipulations were carried out using standard Schlenk and glovebox techniques under high purity dinitrogen gas atmosphere. Deuterated NMR solvents C<sub>6</sub>D<sub>6</sub>/ THF-D<sub>8</sub> were dried by stirring it for 2 days over Na/K alloy followed by distillation in vacuum and degassed. <sup>1</sup>H, <sup>13</sup>C and <sup>29</sup>Si NMR spectra were recorded on Bruker Avance 400 or 500 MHz, 100 MHz and 99 MHz NMR spectrometers respectively and referenced to the resonances of the solvent used. Amidinato-silylene chloride, **LSiCl** (L = PhC(N<sup>t</sup>Bu)<sub>2</sub>) was synthesized as per the procedure reported in the literature.<sup>1</sup>

#### 2. Synthesis

##### Synthesis of compound **1**

Amidinato-silylene chloride, **LSiCl** (2 mmol, 1176 mg) and Ph<sub>2</sub>SiCl<sub>2</sub> (2 mmol, 0.4 ml) were mixed together at – 78° C and stirred for an hour. The resulting brown colored solution was transferred to a flask containing KC<sub>8</sub> (4 mmol, 540 mg) at – 78° C. The solution was slowly brought to the room temperature and stirred overnight. After overnight stirring, the reaction mixture was filtered and solvent was removed under vacuum. The compound was dissolved in hexane and the clear filtrate was concentrated to about 4 ml and kept undisturbed at room temperature for two months. The block-shape colorless crystals of compound **1** were picked up from the flask with 13 % yield (122 mg). <sup>1</sup>H NMR (400 MHz, 298K, C<sub>6</sub>D<sub>6</sub>, ppm): δ = 8.15 (d, *J* = 7.3, 4H, Ar-CH), 7.54 – 7.48 (m, 1H, Ar-CH), 7.22 (t, *J* = 7.4, 4H, Ar-CH), 7.18 – 7.12 (m, 2H, Ar-CH), 7.06 (d, *J* = 7.8, 1H, AR-CH), 7.02 – 6.94 (m, 2H, Ar-CH), 6.94 – 6.86 (m, 1H, Ar-CH), 0.95 (s, 18H, CH<sub>3</sub>). <sup>13</sup>C NMR (100 MHz, 298K, C<sub>6</sub>D<sub>6</sub>): δ = 156.4 (NCN), 139.3 (Ar-C), 134.3 (Ar-C), 133.9 (Ar-C), 131.4 (Ar-C), 129.4 (Ar-C), 128.9 (Ar-C), 128.6 (Ar-C), 127.8 (Ar-C), 127.2 (Ar-C), 52.8 (<sup>t</sup>Butyl-C), 30.9 (CH<sub>3</sub>). <sup>29</sup>Si NMR (99 MHz, C<sub>6</sub>D<sub>6</sub>, ppm): δ = 35.9 and 10.2.

## Synthesis of compound 2

Compound 1 (0.5 mmol, 238 mg) and 1,2-diphenylethyne (0.5 mmol, 90 mg) were mixed at -77° C in toluene and the solution was warmed slowly. Subsequently, the reaction mixture was stirred for 24 h. The resulting reaction mixture was filtered and solvent was removed. The compound was dissolved in hexane and concentrated solution kept for the crystallization at room temperature. Block- shape crystals with 37 % yield (180 mg) were isolated within a week. <sup>1</sup>H NMR (500 MHz, 298K, Toluene-D<sub>8</sub>, ppm): δ = 8.04 – 8.02 (m, 4H, Ar-CH), 7.83– 7.81 (m, 2H, Ar-CH), 7.26 – 7.24 (m, 6H, Ar-CH), 7.17-7.10 (m, 2H, Ar-CH), 7.01- 6.98 (m, 2H, Ar-CH), 6.92 – 6.68 (m, 7H, Ar-CH), 6.86 – 6.78 (m, 2H, Ar-CH), 1.00 (s, 18H, CH<sub>3</sub>). <sup>13</sup>C NMR (125 MHz, 298K, Toluene-D<sub>8</sub>, ppm): δ = 167.7 (NCN), 161.0 (Ar-C), 144.3 (Ar-C), 142.5 (Ar-C), 136.7 (Ar-C), 135.1 (Ar-C), 130.4 (Ar-C), 129.9 (Ar-CH), 129.5 (Ar-C), 128.3 (Ar-C), 126.6-126.5 (C=C), 54.8 (Butyl-C), 32.7 (CH<sub>3</sub>). <sup>29</sup>Si NMR (99 MHz, 298K, Toluene-D<sub>8</sub>, ppm): δ = 17.6 and -71.2.

### 3. NMR spectra

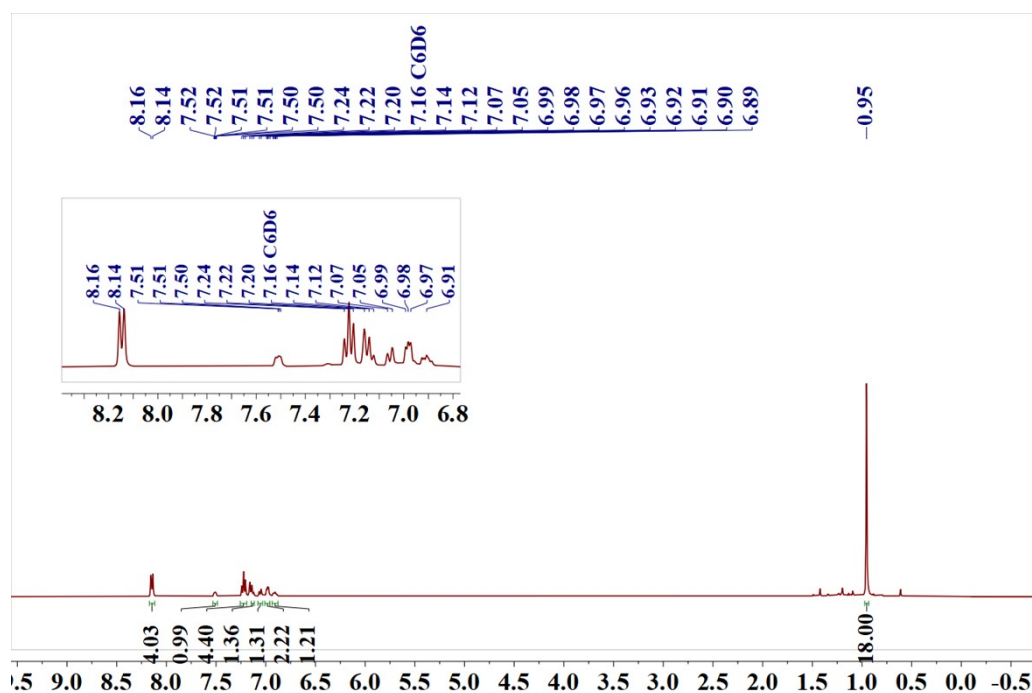

Figure S1. <sup>1</sup>H NMR of compound 1.

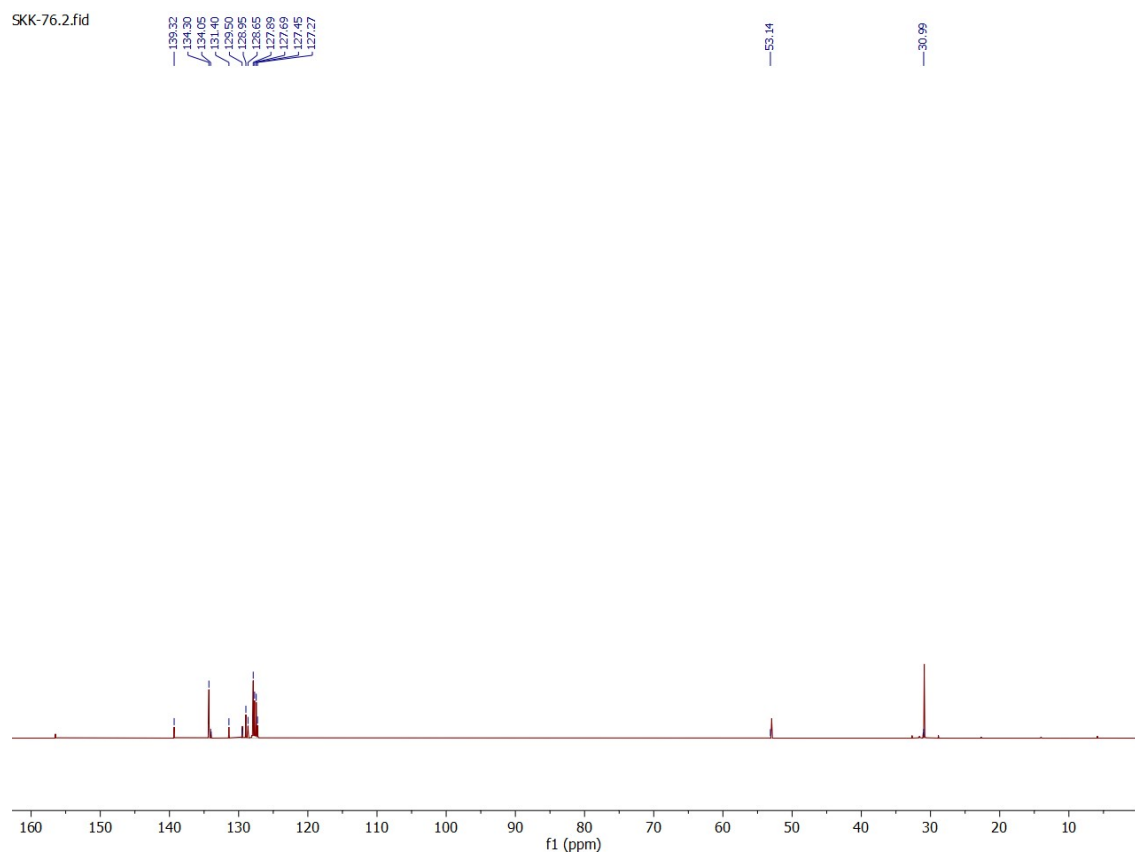

**Figure S2.**  $^{13}\text{C}$  NMR of compound **1**.

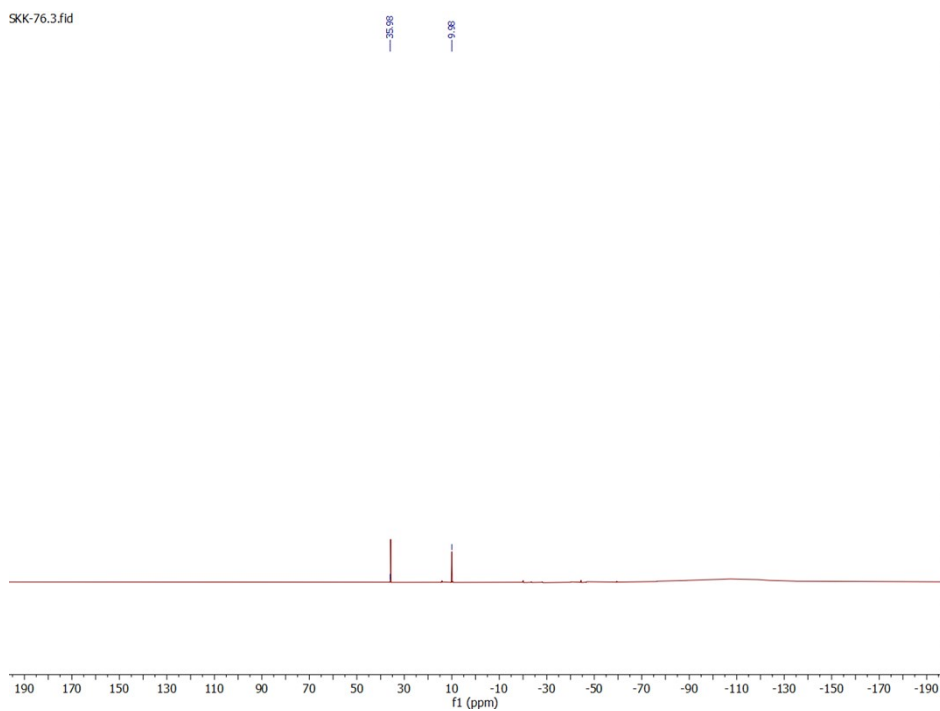

**Figure S3.**  $^{29}\text{Si}$  NMR of compound **1**.

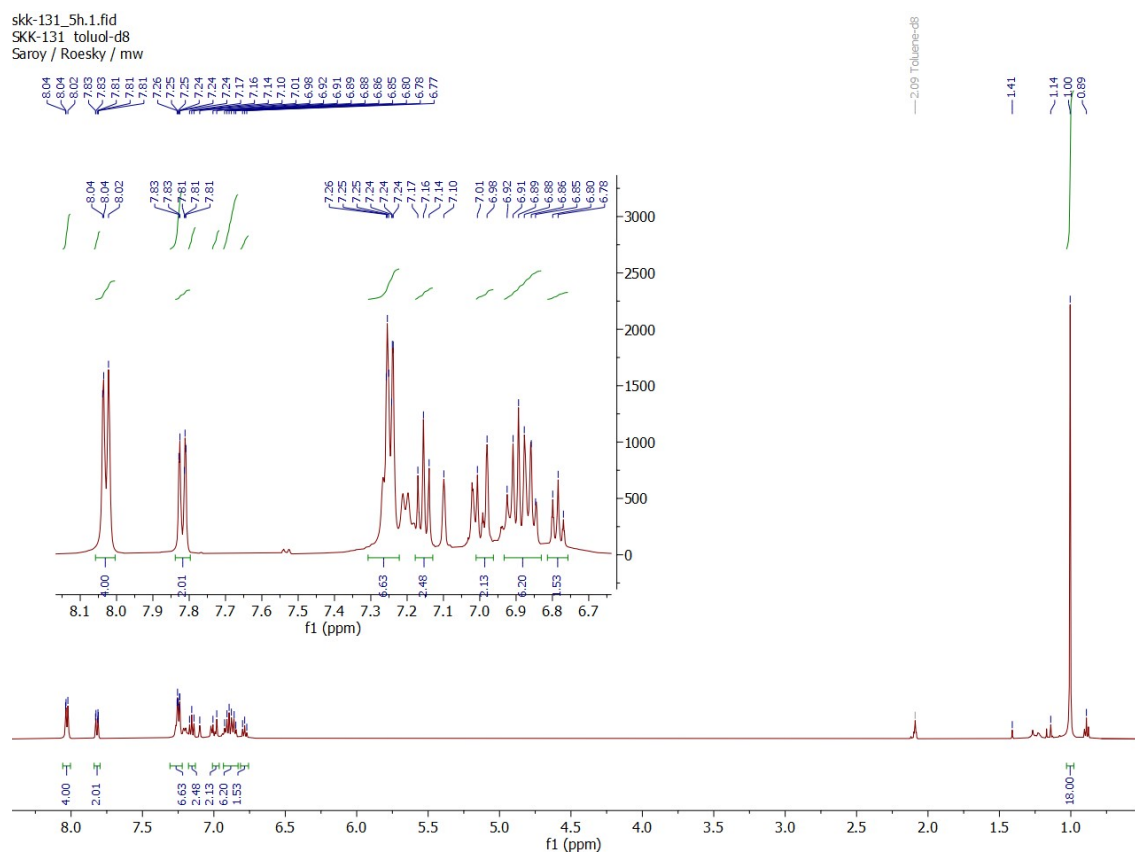

Figure S4.  $^1\text{H}$  NMR of compound 2.

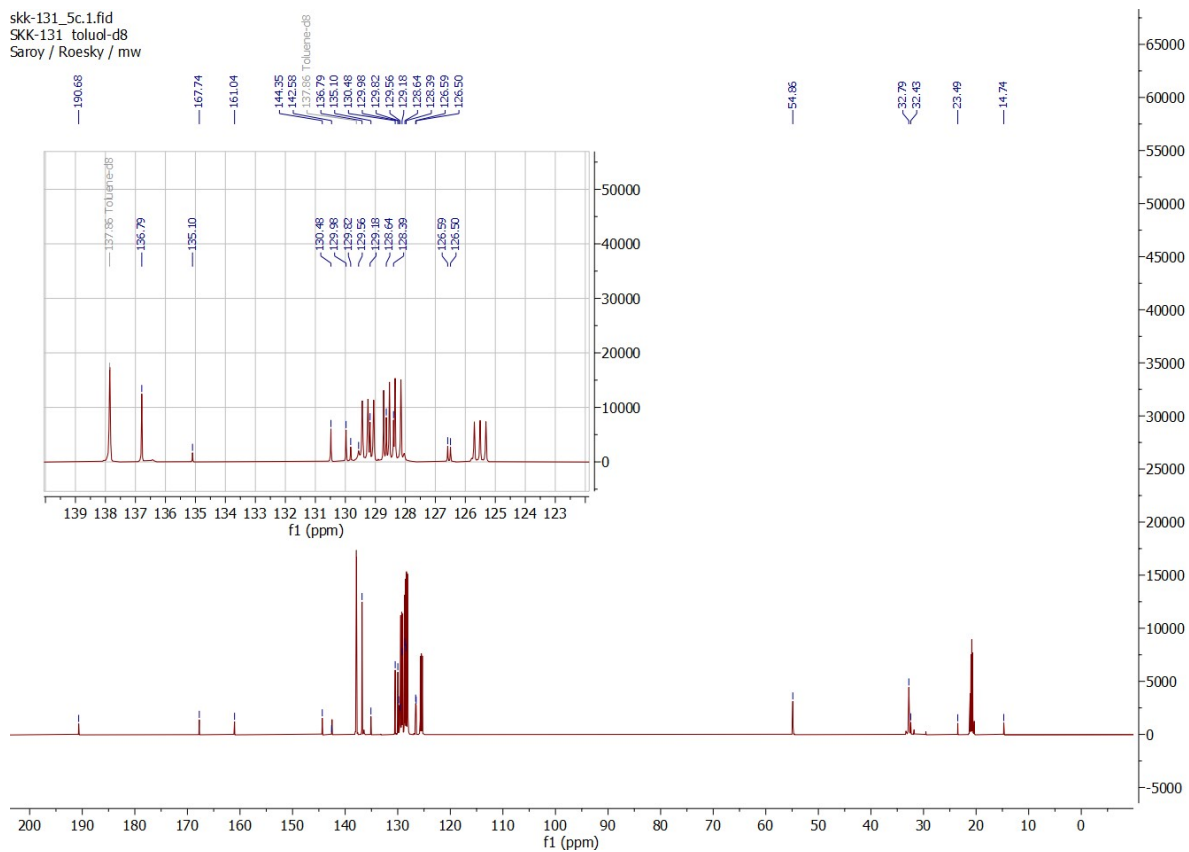

**Figure S5.**  $^{13}\text{C}$  NMR of compound **2**.

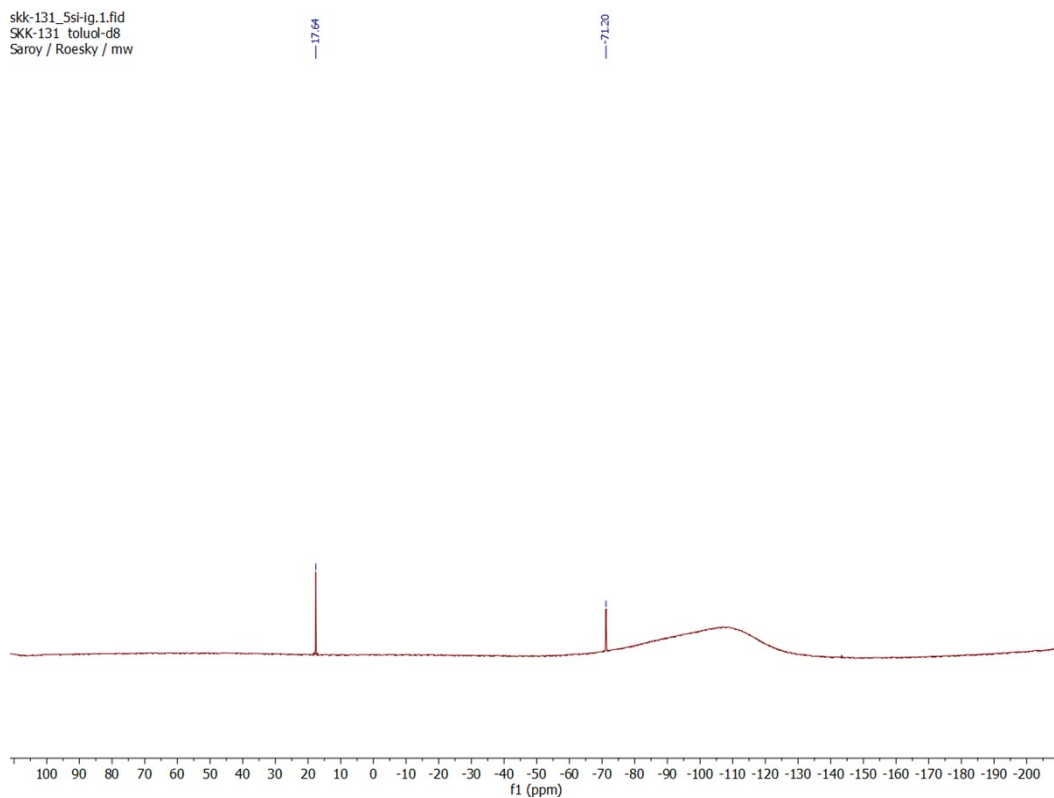

**Figure S6.**  $^{29}\text{Si}$  NMR of compound **2**.

Acq. Data Name: skushva00060-1  
Creation Parameters: Average(MS[1] Time:0.60..0.69)  
External Sample Id: SSK-121

Experiment Date/Time: 4/11/2024 10:19:31 AM  
Ionization Mode: FD+

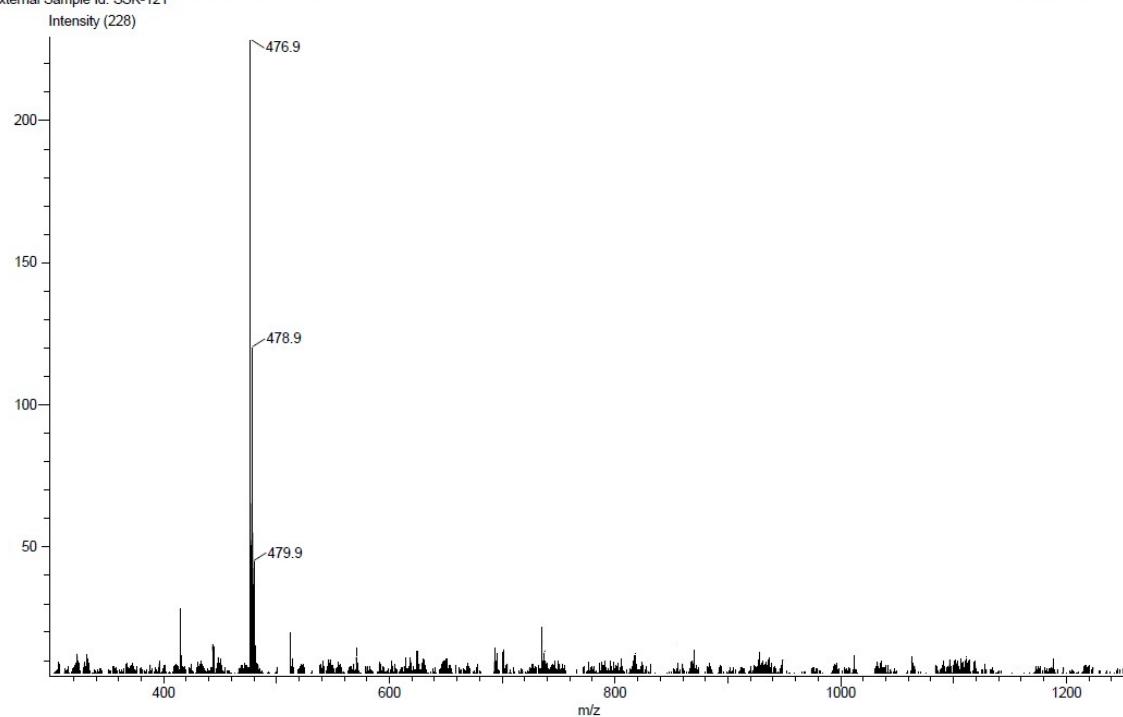

Figure S7. Mass spectrum of 1.

Acq. Data Name: skushva00060-1  
Creation Parameters: Average(MS[1] Time:0.60..0.69)  
External Sample Id: SSK-121

Experiment Date/Time: 4/11/2024 10:19:31 AM  
Ionization Mode: FD+

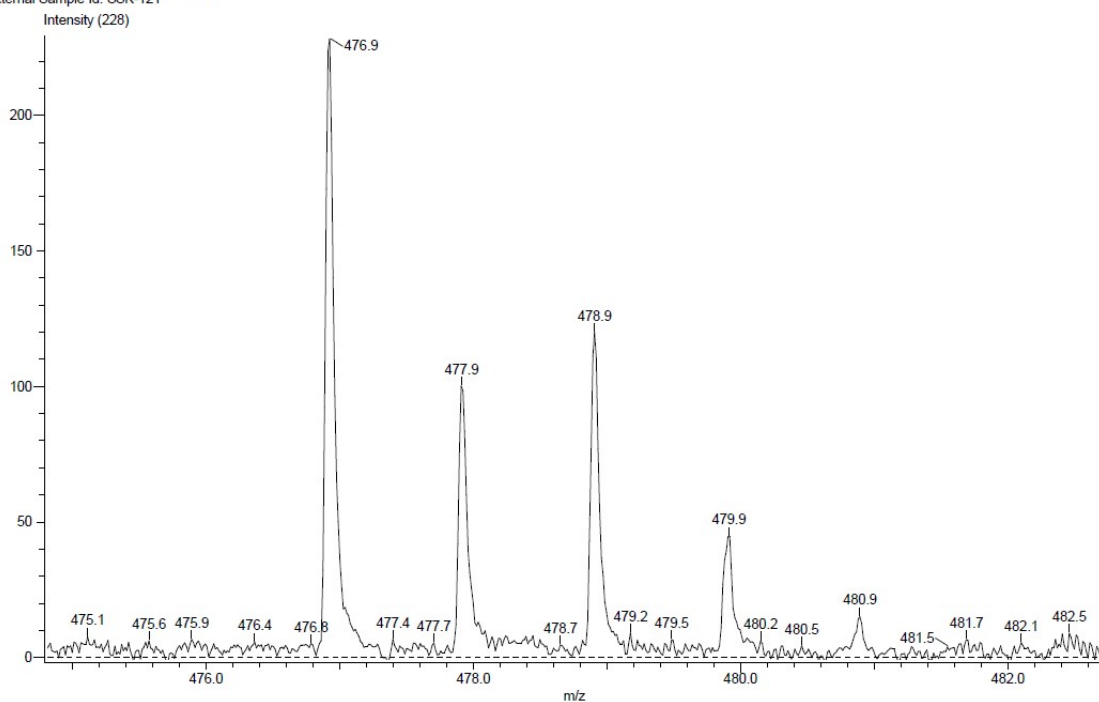

Figure S8. Mass spectrum of 1 (Expanded peak).

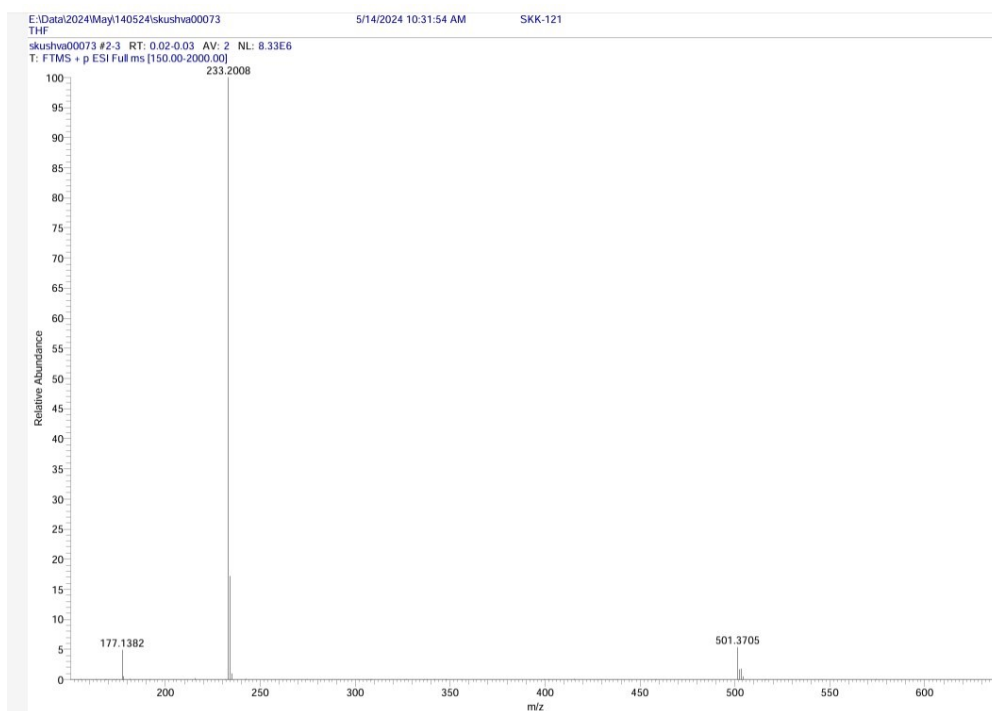

**Figure S9.** HRMS of compound **1**.

Acq. Data Name: skushva00077  
 Creation Parameters: Average(MS[1] Time:0.77-0.83)  
 External Sample Id: SKK-131a

Experiment Date/Time: 5/23/2024 10:07:59 AM  
 Ionization Mode: FD+

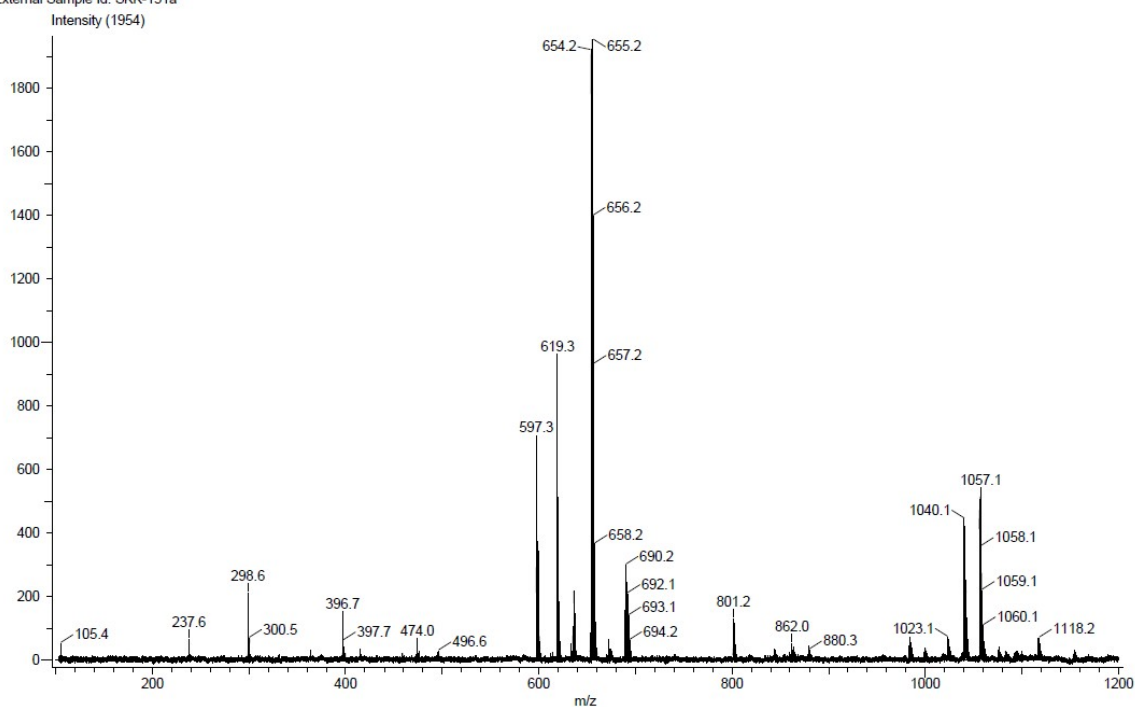

**Figure S10.** Mass spectrum of **2**.

Acq. Data Name: skushva00077  
Creation Parameters: Average(MS[1] Time:0.77..0.83)  
External Sample Id: SKK-131a

Experiment Date/Time: 5/23/2024 10:07:59 AM  
Ionization Mode: FD+

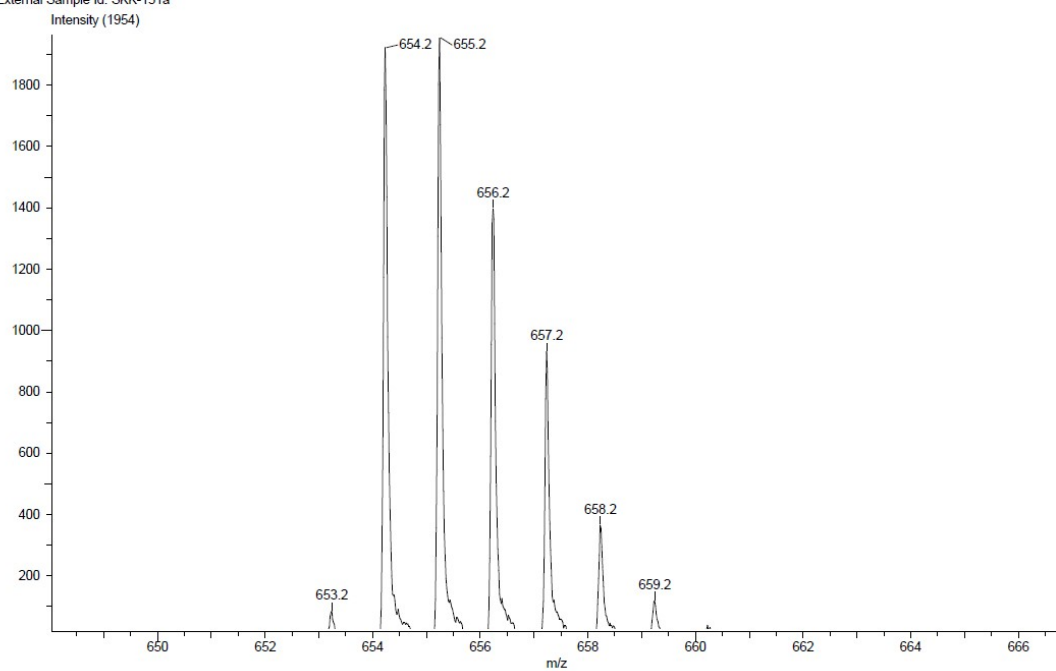

**Figure S11.** Mass spectrum of **2**(Expanded).



#### 4. X-ray diffraction data

**Table S1.** Crystal data and structure refinement for compounds **1** and **2**.

| Compound                                                                 | <b>1</b>                                                         | <b>2</b>                                                         |
|--------------------------------------------------------------------------|------------------------------------------------------------------|------------------------------------------------------------------|
| CCDC                                                                     | 2292820                                                          | 2326834                                                          |
| Empirical formula                                                        | C <sub>27</sub> H <sub>33</sub> ClN <sub>2</sub> Si <sub>2</sub> | C <sub>41</sub> H <sub>43</sub> ClN <sub>2</sub> Si <sub>2</sub> |
| Formula weight                                                           | 477.18                                                           | 655.40                                                           |
| Temperature (K)                                                          | 100(2)                                                           | 100(2)                                                           |
| Wavelength (Å)                                                           | 0.71073                                                          | 0.71073                                                          |
| Crystal system                                                           | Orthorhombic                                                     | Triclinic                                                        |
| Space group                                                              | <i>Pna</i> 2 <sub>1</sub>                                        | <i>P</i> $\bar{1}$                                               |
| <i>a</i> (Å)                                                             | 25.543(4)                                                        | 10.498(2)                                                        |
| <i>b</i> (Å)                                                             | 9.225(2)                                                         | 10.599(2)                                                        |
| <i>c</i> (Å)                                                             | 22.485(3)                                                        | 17.493(4)                                                        |
| $\alpha$ (deg)                                                           | 90                                                               | 72.73(2)                                                         |
| $\beta$ (deg)                                                            | 90                                                               | 85.07(3)                                                         |
| $\gamma$ (deg)                                                           | 90                                                               | 75.62(2)                                                         |
| <i>V</i> (Å <sup>3</sup> )                                               | 5298.2(16)                                                       | 1800.3(7)                                                        |
| <i>Z</i>                                                                 | 8                                                                | 2                                                                |
| Density (Mg/m <sup>3</sup> )                                             | 1.196                                                            | 1.209                                                            |
| $\mu$ /mm <sup>-1</sup>                                                  | 0.252                                                            | 0.204                                                            |
| Crystal size(mm)                                                         | 0.34 x 0.175 x 0.13                                              | 0.183 x 0.152 x 0.124                                            |
| Crystal color, shape                                                     | Yellow block                                                     | Colorless block                                                  |
| $\theta$ range (deg)                                                     | 1.594 to 28.393                                                  | 1.219 to 27.219                                                  |
| Reflections collected                                                    | 200799                                                           | 80583                                                            |
| Independent reflections                                                  | 13285                                                            | 8015                                                             |
| <i>R</i> <sub>int</sub>                                                  | 0.0488                                                           | 0.0409                                                           |
| Data/restraints/parameters                                               | 13285 / 4077 / 865                                               | 8015 / 0 / 421                                                   |
| <i>R</i> <sub>1</sub> <sup>a</sup> ( <i>I</i> > 2 $\sigma$ ( <i>I</i> )) | 0.0268                                                           | 0.0325                                                           |
| <i>wR</i> <sub>2</sub> <sup>b</sup> (all data)                           | 0.0668                                                           | 0.0849                                                           |
| Absolute structure parameter                                             | 0.104(11)                                                        | -                                                                |
| $\Delta\rho_{\max}/\Delta\rho_{\min}$ (e Å <sup>-3</sup> )               | 0.218 and -0.169                                                 | 0.343 and -0.271                                                 |

$$^aR_1 = \sum||F_o| - |F_c||/\sum|F_o|. \quad ^b wR_2 = [\sum w(F_o^2 - F_c^2)^2/\sum(F_o^2)^2]^{1/2}$$

The datasets were collected on a Bruker D8 three circle diffractometer, equipped with a SMART APEX II CCD detector and an INCOATEC microfocus source (Mo K $\alpha$  radiation) with

INCOATEC Quazar mirror optics. The data were integrated with SAINT<sup>2</sup> and a multi-scan absorption correction was applied using SADABS<sup>3</sup>. The structures were solved by SHELXT<sup>4</sup> and refined on  $F^2$  using SHELXL<sup>4</sup> in the graphical user interface ShelXle.<sup>5</sup>

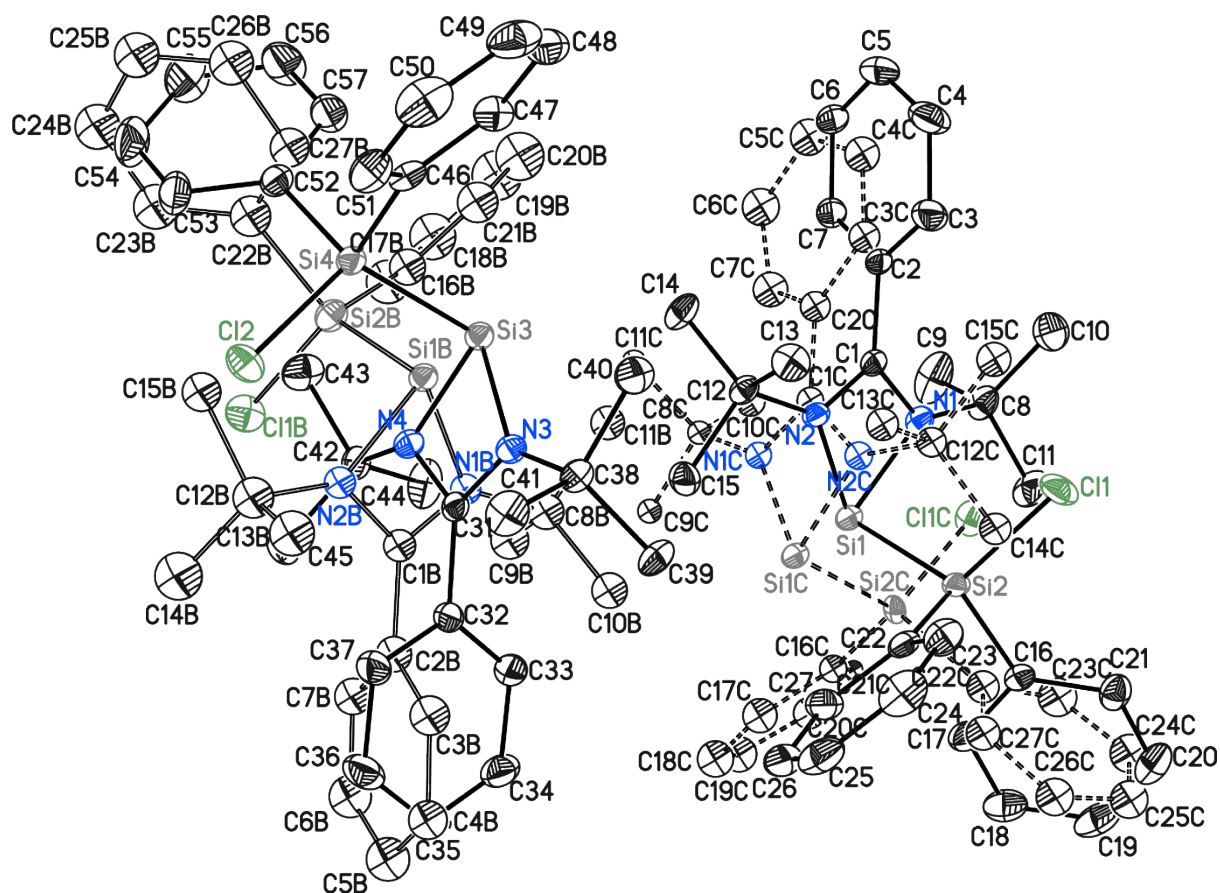

**Figure S12.** The asymmetric unit of **1** with thermal ellipsoids at 50% probability level. The hydrogen atoms are omitted for clarity. The asymmetric unit contains two molecules, each disordered over two positions. They were refined with distance restraints and restraints for the anisotropic displacement parameters. The occupancy of the main position of one molecule refined to 0.9678(8) and the other molecule refined to 0.9650(8).

**Table S2.** Bond lengths [Å] and angles [°] for **1**.

|             |            |             |          |
|-------------|------------|-------------|----------|
| Si(1)-N(2)  | 1.8563(18) | N(2)-C(1)   | 1.337(3) |
| Si(1)-N(1)  | 1.8690(18) | N(2)-C(12)  | 1.475(2) |
| Si(1)-C(1)  | 2.335(2)   | C(12)-C(13) | 1.528(3) |
| Si(1)-Si(2) | 2.3884(8)  | C(12)-C(15) | 1.531(3) |
| N(1)-C(1)   | 1.338(3)   | C(12)-C(14) | 1.534(3) |
| N(1)-C(8)   | 1.478(3)   | C(1)-C(2)   | 1.492(3) |
| C(8)-C(9)   | 1.527(3)   | C(2)-C(3)   | 1.394(3) |
| C(8)-C(11)  | 1.527(3)   | C(2)-C(7)   | 1.395(3) |
| C(8)-C(10)  | 1.530(4)   | C(3)-C(4)   | 1.395(3) |

|             |            |               |           |
|-------------|------------|---------------|-----------|
| C(4)-C(5)   | 1.390(4)   | C(36)-C(37)   | 1.386(3)  |
| C(5)-C(6)   | 1.389(4)   | Cl(2)-Si(4)   | 2.0898(8) |
| C(6)-C(7)   | 1.394(3)   | Si(4)-C(46)   | 1.876(2)  |
| Cl(1)-Si(2) | 2.0947(8)  | Si(4)-C(52)   | 1.877(2)  |
| Si(2)-C(16) | 1.878(2)   | C(46)-C(47)   | 1.399(3)  |
| Si(2)-C(22) | 1.888(2)   | C(46)-C(51)   | 1.401(3)  |
| C(16)-C(21) | 1.395(3)   | C(47)-C(48)   | 1.389(3)  |
| C(16)-C(17) | 1.410(3)   | C(48)-C(49)   | 1.377(4)  |
| C(17)-C(18) | 1.389(3)   | C(49)-C(50)   | 1.376(4)  |
| C(18)-C(19) | 1.381(4)   | C(50)-C(51)   | 1.399(4)  |
| C(19)-C(20) | 1.387(4)   | C(52)-C(53)   | 1.398(3)  |
| C(20)-C(21) | 1.389(3)   | C(52)-C(57)   | 1.399(3)  |
| C(22)-C(23) | 1.397(3)   | C(53)-C(54)   | 1.386(4)  |
| C(22)-C(27) | 1.402(3)   | C(54)-C(55)   | 1.379(4)  |
| C(23)-C(24) | 1.394(3)   | C(55)-C(56)   | 1.386(4)  |
| C(24)-C(25) | 1.375(4)   | C(56)-C(57)   | 1.391(3)  |
| C(25)-C(26) | 1.383(4)   | Si(1B)-N(1B)  | 1.826(19) |
| C(26)-C(27) | 1.393(3)   | Si(1B)-N(2B)  | 1.857(19) |
| Si(3)-N(3)  | 1.8548(17) | Si(1B)-C(1B)  | 2.310(19) |
| Si(3)-N(4)  | 1.8678(18) | Si(1B)-Si(2B) | 2.377(16) |
| Si(3)-C(31) | 2.332(2)   | N(1B)-C(1B)   | 1.34(2)   |
| Si(3)-Si(4) | 2.3773(8)  | N(1B)-C(8B)   | 1.474(19) |
| N(3)-C(31)  | 1.339(3)   | C(8B)-C(9B)   | 1.52(2)   |
| N(3)-C(38)  | 1.480(2)   | C(8B)-C(10B)  | 1.53(2)   |
| C(38)-C(41) | 1.532(3)   | C(8B)-C(11B)  | 1.53(2)   |
| C(38)-C(39) | 1.532(3)   | N(2B)-C(1B)   | 1.34(2)   |
| C(38)-C(40) | 1.533(3)   | N(2B)-C(12B)  | 1.475(19) |
| N(4)-C(31)  | 1.345(2)   | C(12B)-C(14B) | 1.53(2)   |
| N(4)-C(42)  | 1.482(3)   | C(12B)-C(15B) | 1.53(2)   |
| C(42)-C(43) | 1.525(3)   | C(12B)-C(13B) | 1.54(2)   |
| C(42)-C(44) | 1.526(3)   | C(1B)-C(2B)   | 1.483(19) |
| C(42)-C(45) | 1.530(3)   | C(2B)-C(3B)   | 1.39(2)   |
| C(31)-C(32) | 1.492(3)   | C(2B)-C(7B)   | 1.39(2)   |
| C(32)-C(33) | 1.391(3)   | C(3B)-C(4B)   | 1.39(2)   |
| C(32)-C(37) | 1.395(3)   | C(4B)-C(5B)   | 1.39(2)   |
| C(33)-C(34) | 1.392(3)   | C(5B)-C(6B)   | 1.39(2)   |
| C(34)-C(35) | 1.380(4)   | C(6B)-C(7B)   | 1.40(2)   |
| C(35)-C(36) | 1.385(4)   | Cl(1B)-Si(2B) | 2.079(17) |

|               |           |                   |            |
|---------------|-----------|-------------------|------------|
| Si(2B)-C(16B) | 1.877(18) | C(16C)-C(21C)     | 1.393(19)  |
| Si(2B)-C(22B) | 1.878(18) | C(16C)-C(17C)     | 1.405(19)  |
| C(16B)-C(17B) | 1.399(19) | C(17C)-C(18C)     | 1.39(2)    |
| C(16B)-C(21B) | 1.403(19) | C(18C)-C(19C)     | 1.37(2)    |
| C(17B)-C(18B) | 1.40(2)   | C(19C)-C(20C)     | 1.38(2)    |
| C(18B)-C(19B) | 1.37(2)   | C(20C)-C(21C)     | 1.39(2)    |
| C(19B)-C(20B) | 1.37(2)   | C(22C)-C(27C)     | 1.383(19)  |
| C(20B)-C(21B) | 1.40(2)   | C(22C)-C(23C)     | 1.410(19)  |
| C(22B)-C(23B) | 1.391(19) | C(23C)-C(24C)     | 1.40(2)    |
| C(22B)-C(27B) | 1.405(19) | C(24C)-C(25C)     | 1.37(2)    |
| C(23B)-C(24B) | 1.40(2)   | C(25C)-C(26C)     | 1.37(2)    |
| C(24B)-C(25B) | 1.37(2)   | C(26C)-C(27C)     | 1.41(2)    |
| C(25B)-C(26B) | 1.37(2)   |                   |            |
| C(26B)-C(27B) | 1.40(2)   | N(2)-Si(1)-N(1)   | 69.65(7)   |
| Si(1C)-N(2C)  | 1.846(19) | N(2)-Si(1)-C(1)   | 34.90(7)   |
| Si(1C)-N(1C)  | 1.861(19) | N(1)-Si(1)-C(1)   | 34.93(7)   |
| Si(1C)-C(1C)  | 2.325(18) | N(2)-Si(1)-Si(2)  | 98.01(6)   |
| Si(1C)-Si(2C) | 2.367(16) | N(1)-Si(1)-Si(2)  | 96.94(6)   |
| N(1C)-C(1C)   | 1.35(2)   | C(1)-Si(1)-Si(2)  | 101.85(5)  |
| N(1C)-C(8C)   | 1.472(19) | C(1)-N(1)-C(8)    | 130.56(17) |
| C(8C)-C(10C)  | 1.53(2)   | C(1)-N(1)-Si(1)   | 91.94(13)  |
| C(8C)-C(11C)  | 1.533(19) | C(8)-N(1)-Si(1)   | 136.06(14) |
| C(8C)-C(9C)   | 1.54(2)   | N(1)-C(8)-C(9)    | 109.78(18) |
| N(2C)-C(1C)   | 1.35(2)   | N(1)-C(8)-C(11)   | 105.72(18) |
| N(2C)-C(12C)  | 1.475(19) | C(9)-C(8)-C(11)   | 110.1(2)   |
| C(12C)-C(15C) | 1.530(19) | N(1)-C(8)-C(10)   | 111.59(19) |
| C(12C)-C(13C) | 1.54(2)   | C(9)-C(8)-C(10)   | 110.8(2)   |
| C(12C)-C(14C) | 1.54(2)   | C(11)-C(8)-C(10)  | 108.7(2)   |
| C(1C)-C(2C)   | 1.492(19) | C(1)-N(2)-C(12)   | 130.75(17) |
| C(2C)-C(3C)   | 1.39(2)   | C(1)-N(2)-Si(1)   | 92.52(12)  |
| C(2C)-C(7C)   | 1.40(2)   | C(12)-N(2)-Si(1)  | 136.34(14) |
| C(3C)-C(4C)   | 1.39(2)   | N(2)-C(12)-C(13)  | 109.74(17) |
| C(4C)-C(5C)   | 1.39(2)   | N(2)-C(12)-C(15)  | 106.02(16) |
| C(5C)-C(6C)   | 1.39(2)   | C(13)-C(12)-C(15) | 108.74(17) |
| C(6C)-C(7C)   | 1.40(2)   | N(2)-C(12)-C(14)  | 112.06(16) |
| Cl(1C)-Si(2C) | 2.082(16) | C(13)-C(12)-C(14) | 111.17(18) |
| Si(2C)-C(16C) | 1.872(18) | C(15)-C(12)-C(14) | 108.93(18) |
| Si(2C)-C(22C) | 1.903(18) | N(2)-C(1)-N(1)    | 105.35(17) |

|                   |            |                   |            |
|-------------------|------------|-------------------|------------|
| N(2)-C(1)-C(2)    | 125.81(18) | N(3)-Si(3)-Si(4)  | 99.96(6)   |
| N(1)-C(1)-C(2)    | 128.80(18) | N(4)-Si(3)-Si(4)  | 98.64(6)   |
| N(2)-C(1)-Si(1)   | 52.58(10)  | C(31)-Si(3)-Si(4) | 104.26(5)  |
| N(1)-C(1)-Si(1)   | 53.12(10)  | C(31)-N(3)-C(38)  | 130.53(17) |
| C(2)-C(1)-Si(1)   | 172.94(15) | C(31)-N(3)-Si(3)  | 92.37(12)  |
| C(3)-C(2)-C(7)    | 119.93(19) | C(38)-N(3)-Si(3)  | 137.08(14) |
| C(3)-C(2)-C(1)    | 119.53(18) | N(3)-C(38)-C(41)  | 109.39(17) |
| C(7)-C(2)-C(1)    | 120.44(19) | N(3)-C(38)-C(39)  | 111.76(16) |
| C(2)-C(3)-C(4)    | 120.1(2)   | C(41)-C(38)-C(39) | 111.01(18) |
| C(5)-C(4)-C(3)    | 120.0(2)   | N(3)-C(38)-C(40)  | 106.87(16) |
| C(6)-C(5)-C(4)    | 119.8(2)   | C(41)-C(38)-C(40) | 108.67(18) |
| C(5)-C(6)-C(7)    | 120.7(2)   | C(39)-C(38)-C(40) | 109.00(18) |
| C(6)-C(7)-C(2)    | 119.5(2)   | C(31)-N(4)-C(42)  | 130.36(17) |
| C(16)-Si(2)-C(22) | 106.13(9)  | C(31)-N(4)-Si(3)  | 91.58(13)  |
| C(16)-Si(2)-Cl(1) | 106.84(7)  | C(42)-N(4)-Si(3)  | 134.66(14) |
| C(22)-Si(2)-Cl(1) | 105.46(7)  | N(4)-C(42)-C(43)  | 106.14(17) |
| C(16)-Si(2)-Si(1) | 108.12(7)  | N(4)-C(42)-C(44)  | 110.15(17) |
| C(22)-Si(2)-Si(1) | 115.96(7)  | C(43)-C(42)-C(44) | 109.1(2)   |
| Cl(1)-Si(2)-Si(1) | 113.73(3)  | N(4)-C(42)-C(45)  | 112.14(17) |
| C(21)-C(16)-C(17) | 117.7(2)   | C(43)-C(42)-C(45) | 108.84(19) |
| C(21)-C(16)-Si(2) | 125.33(17) | C(44)-C(42)-C(45) | 110.38(19) |
| C(17)-C(16)-Si(2) | 116.96(16) | N(3)-C(31)-N(4)   | 105.44(17) |
| C(18)-C(17)-C(16) | 120.9(2)   | N(3)-C(31)-C(32)  | 128.19(17) |
| C(19)-C(18)-C(17) | 120.3(2)   | N(4)-C(31)-C(32)  | 126.35(18) |
| C(18)-C(19)-C(20) | 119.7(2)   | N(3)-C(31)-Si(3)  | 52.63(10)  |
| C(19)-C(20)-C(21) | 120.2(2)   | N(4)-C(31)-Si(3)  | 53.20(10)  |
| C(20)-C(21)-C(16) | 121.2(2)   | C(32)-C(31)-Si(3) | 173.41(14) |
| C(23)-C(22)-C(27) | 117.3(2)   | C(33)-C(32)-C(37) | 119.7(2)   |
| C(23)-C(22)-Si(2) | 124.16(17) | C(33)-C(32)-C(31) | 121.38(19) |
| C(27)-C(22)-Si(2) | 118.41(16) | C(37)-C(32)-C(31) | 118.86(19) |
| C(24)-C(23)-C(22) | 121.1(2)   | C(32)-C(33)-C(34) | 119.9(2)   |
| C(25)-C(24)-C(23) | 120.3(2)   | C(35)-C(34)-C(33) | 120.1(2)   |
| C(24)-C(25)-C(26) | 120.2(2)   | C(34)-C(35)-C(36) | 120.1(2)   |
| C(25)-C(26)-C(27) | 119.5(3)   | C(35)-C(36)-C(37) | 120.3(2)   |
| C(26)-C(27)-C(22) | 121.6(2)   | C(36)-C(37)-C(32) | 119.8(2)   |
| N(3)-Si(3)-N(4)   | 70.01(7)   | C(46)-Si(4)-C(52) | 109.83(9)  |
| N(3)-Si(3)-C(31)  | 35.00(7)   | C(46)-Si(4)-Cl(2) | 106.61(7)  |
| N(4)-Si(3)-C(31)  | 35.22(7)   | C(52)-Si(4)-Cl(2) | 106.78(8)  |

|                     |            |                      |           |
|---------------------|------------|----------------------|-----------|
| C(46)-Si(4)-Si(3)   | 111.16(7)  | N(2B)-C(12B)-C(15B)  | 107(2)    |
| C(52)-Si(4)-Si(3)   | 106.48(7)  | C(14B)-C(12B)-C(15B) | 112(3)    |
| Cl(2)-Si(4)-Si(3)   | 115.82(3)  | N(2B)-C(12B)-C(13B)  | 110(2)    |
| C(47)-C(46)-C(51)   | 117.8(2)   | C(14B)-C(12B)-C(13B) | 109(2)    |
| C(47)-C(46)-Si(4)   | 117.57(16) | C(15B)-C(12B)-C(13B) | 108(2)    |
| C(51)-C(46)-Si(4)   | 124.66(18) | N(2B)-C(1B)-N(1B)    | 105.2(15) |
| C(48)-C(47)-C(46)   | 121.5(2)   | N(2B)-C(1B)-C(2B)    | 128.7(17) |
| C(49)-C(48)-C(47)   | 119.8(2)   | N(1B)-C(1B)-C(2B)    | 126.1(17) |
| C(50)-C(49)-C(48)   | 120.3(2)   | N(2B)-C(1B)-Si(1B)   | 53.5(10)  |
| C(49)-C(50)-C(51)   | 120.4(2)   | N(1B)-C(1B)-Si(1B)   | 52.2(9)   |
| C(50)-C(51)-C(46)   | 120.4(2)   | C(2B)-C(1B)-Si(1B)   | 174(2)    |
| C(53)-C(52)-C(57)   | 117.4(2)   | C(3B)-C(2B)-C(7B)    | 119(2)    |
| C(53)-C(52)-Si(4)   | 124.59(19) | C(3B)-C(2B)-C(1B)    | 120(2)    |
| C(57)-C(52)-Si(4)   | 117.67(17) | C(7B)-C(2B)-C(1B)    | 121(2)    |
| C(54)-C(53)-C(52)   | 121.5(2)   | C(2B)-C(3B)-C(4B)    | 121(2)    |
| C(55)-C(54)-C(53)   | 119.9(2)   | C(3B)-C(4B)-C(5B)    | 120(3)    |
| C(54)-C(55)-C(56)   | 120.3(2)   | C(4B)-C(5B)-C(6B)    | 120(3)    |
| C(55)-C(56)-C(57)   | 119.5(2)   | C(5B)-C(6B)-C(7B)    | 120(3)    |
| C(56)-C(57)-C(52)   | 121.4(2)   | C(2B)-C(7B)-C(6B)    | 120(2)    |
| N(1B)-Si(1B)-N(2B)  | 70.7(9)    | C(16B)-Si(2B)-C(22B) | 108.9(18) |
| N(1B)-Si(1B)-C(1B)  | 35.5(7)    | C(16B)-Si(2B)-Cl(1B) | 106.4(12) |
| N(2B)-Si(1B)-C(1B)  | 35.4(7)    | C(22B)-Si(2B)-Cl(1B) | 107.2(12) |
| N(1B)-Si(1B)-Si(2B) | 98.6(13)   | C(16B)-Si(2B)-Si(1B) | 113.0(14) |
| N(2B)-Si(1B)-Si(2B) | 98.5(13)   | C(22B)-Si(2B)-Si(1B) | 106.6(13) |
| C(1B)-Si(1B)-Si(2B) | 103.7(12)  | Cl(1B)-Si(2B)-Si(1B) | 114.5(8)  |
| C(1B)-N(1B)-C(8B)   | 133(2)     | C(17B)-C(16B)-C(21B) | 116(2)    |
| C(1B)-N(1B)-Si(1B)  | 92.3(12)   | C(17B)-C(16B)-Si(2B) | 123(2)    |
| C(8B)-N(1B)-Si(1B)  | 134.7(18)  | C(21B)-C(16B)-Si(2B) | 120(2)    |
| N(1B)-C(8B)-C(9B)   | 111(2)     | C(16B)-C(17B)-C(18B) | 122(3)    |
| N(1B)-C(8B)-C(10B)  | 109(2)     | C(19B)-C(18B)-C(17B) | 120(3)    |
| C(9B)-C(8B)-C(10B)  | 111(2)     | C(18B)-C(19B)-C(20B) | 119(3)    |
| N(1B)-C(8B)-C(11B)  | 108(2)     | C(19B)-C(20B)-C(21B) | 121(3)    |
| C(9B)-C(8B)-C(11B)  | 110(2)     | C(20B)-C(21B)-C(16B) | 121(2)    |
| C(10B)-C(8B)-C(11B) | 108(2)     | C(23B)-C(22B)-C(27B) | 121(2)    |
| C(1B)-N(2B)-C(12B)  | 133(2)     | C(23B)-C(22B)-Si(2B) | 122(2)    |
| C(1B)-N(2B)-Si(1B)  | 91.1(12)   | C(27B)-C(22B)-Si(2B) | 117(2)    |
| C(12B)-N(2B)-Si(1B) | 134.7(19)  | C(22B)-C(23B)-C(24B) | 119(2)    |
| N(2B)-C(12B)-C(14B) | 111(2)     | C(25B)-C(24B)-C(23B) | 119(3)    |

|                      |           |                      |           |
|----------------------|-----------|----------------------|-----------|
| C(26B)-C(25B)-C(24B) | 123(3)    | C(6C)-C(5C)-C(4C)    | 118(3)    |
| C(25B)-C(26B)-C(27B) | 119(3)    | C(5C)-C(6C)-C(7C)    | 120(3)    |
| C(26B)-C(27B)-C(22B) | 119(2)    | C(2C)-C(7C)-C(6C)    | 122(2)    |
| N(2C)-Si(1C)-N(1C)   | 70.8(9)   | C(16C)-Si(2C)-C(22C) | 108.4(10) |
| N(2C)-Si(1C)-C(1C)   | 35.4(7)   | C(16C)-Si(2C)-Cl(1C) | 108.3(11) |
| N(1C)-Si(1C)-C(1C)   | 35.6(7)   | C(22C)-Si(2C)-Cl(1C) | 101.0(10) |
| N(2C)-Si(1C)-Si(2C)  | 101.0(13) | C(16C)-Si(2C)-Si(1C) | 109.9(10) |
| N(1C)-Si(1C)-Si(2C)  | 98.7(13)  | C(22C)-Si(2C)-Si(1C) | 112.0(11) |
| C(1C)-Si(1C)-Si(2C)  | 104.5(12) | Cl(1C)-Si(2C)-Si(1C) | 116.7(8)  |
| C(1C)-N(1C)-C(8C)    | 132(2)    | C(21C)-C(16C)-C(17C) | 116(2)    |
| C(1C)-N(1C)-Si(1C)   | 91.3(12)  | C(21C)-C(16C)-Si(2C) | 126(2)    |
| C(8C)-N(1C)-Si(1C)   | 136.9(18) | C(17C)-C(16C)-Si(2C) | 118(2)    |
| N(1C)-C(8C)-C(10C)   | 110(2)    | C(18C)-C(17C)-C(16C) | 121(2)    |
| N(1C)-C(8C)-C(11C)   | 111(2)    | C(19C)-C(18C)-C(17C) | 121(3)    |
| C(10C)-C(8C)-C(11C)  | 109(2)    | C(18C)-C(19C)-C(20C) | 119(3)    |
| N(1C)-C(8C)-C(9C)    | 112(2)    | C(19C)-C(20C)-C(21C) | 119(3)    |
| C(10C)-C(8C)-C(9C)   | 106(2)    | C(16C)-C(21C)-C(20C) | 123(2)    |
| C(11C)-C(8C)-C(9C)   | 109(2)    | C(27C)-C(22C)-C(23C) | 117(2)    |
| C(1C)-N(2C)-C(12C)   | 133(2)    | C(27C)-C(22C)-Si(2C) | 127(2)    |
| C(1C)-N(2C)-Si(1C)   | 92.1(12)  | C(23C)-C(22C)-Si(2C) | 115.3(19) |
| C(12C)-N(2C)-Si(1C)  | 134.8(18) | C(24C)-C(23C)-C(22C) | 122(2)    |
| N(2C)-C(12C)-C(15C)  | 112(2)    | C(25C)-C(24C)-C(23C) | 118(3)    |
| N(2C)-C(12C)-C(13C)  | 108(2)    | C(26C)-C(25C)-C(24C) | 123(3)    |
| C(15C)-C(12C)-C(13C) | 110(2)    | C(25C)-C(26C)-C(27C) | 118(3)    |
| N(2C)-C(12C)-C(14C)  | 112(2)    | C(22C)-C(27C)-C(26C) | 121(2)    |
| C(15C)-C(12C)-C(14C) | 107(2)    |                      |           |
| C(13C)-C(12C)-C(14C) | 108(2)    |                      |           |
| N(2C)-C(1C)-N(1C)    | 105.4(15) |                      |           |
| N(2C)-C(1C)-C(2C)    | 125.6(17) |                      |           |
| N(1C)-C(1C)-C(2C)    | 129.0(17) |                      |           |
| N(2C)-C(1C)-Si(1C)   | 52.5(9)   |                      |           |
| N(1C)-C(1C)-Si(1C)   | 53.1(9)   |                      |           |
| C(2C)-C(1C)-Si(1C)   | 177(2)    |                      |           |
| C(3C)-C(2C)-C(7C)    | 117(2)    |                      |           |
| C(3C)-C(2C)-C(1C)    | 123(2)    |                      |           |
| C(7C)-C(2C)-C(1C)    | 120(2)    |                      |           |
| C(2C)-C(3C)-C(4C)    | 122(2)    |                      |           |
| C(3C)-C(4C)-C(5C)    | 121(3)    |                      |           |

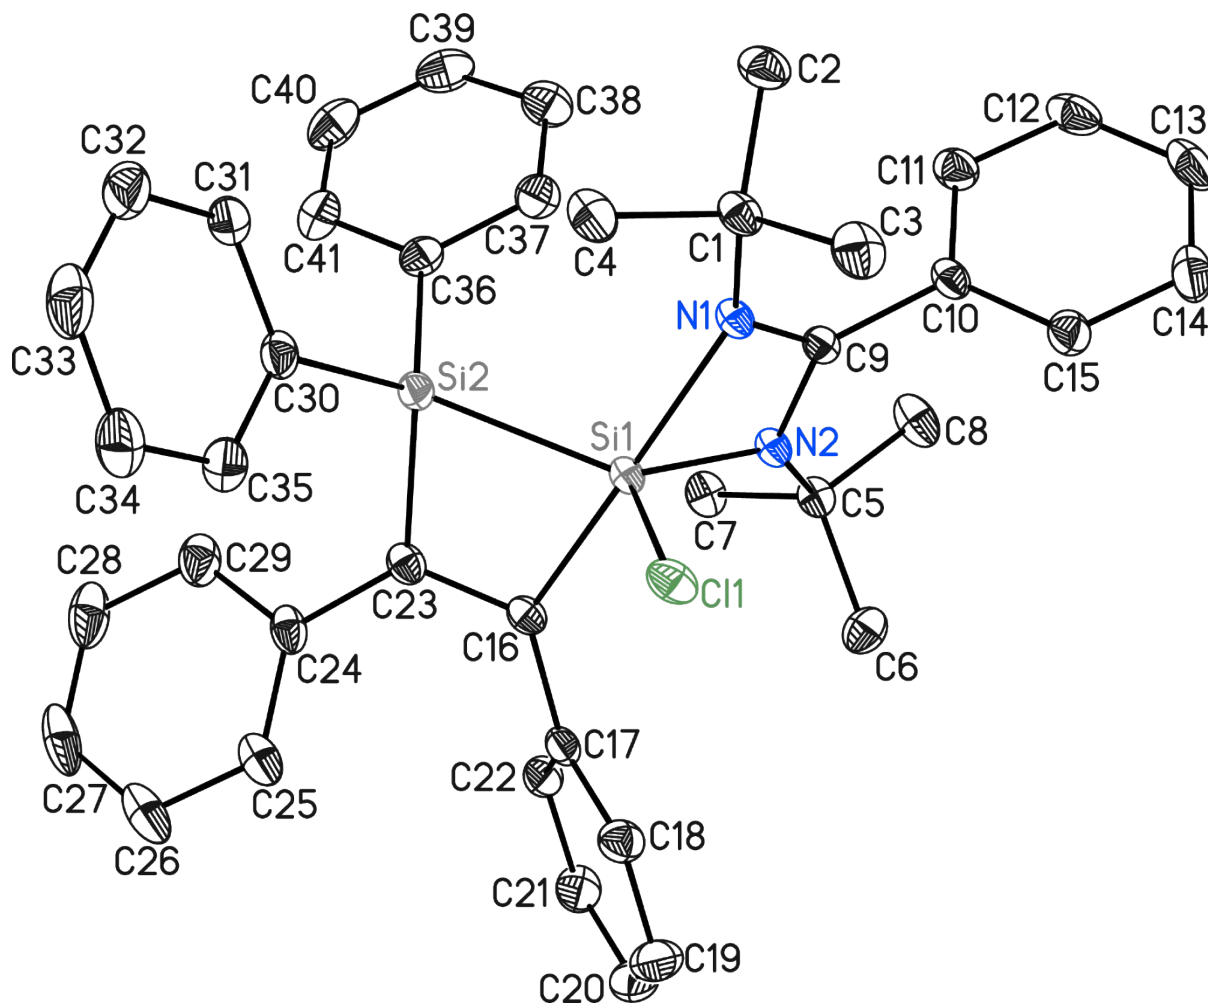

**Figure S13.** The asymmetric unit of **2** with thermal ellipsoids at 50% probability level. The hydrogen atoms are omitted for clarity.

**Table S3.** Bond lengths [Å] and angles [°] for **2**.

|             |            |             |            |
|-------------|------------|-------------|------------|
| Cl(1)-Si(1) | 2.1218(6)  | N(2)-C(5)   | 1.4971(16) |
| Si(1)-N(2)  | 1.8339(12) | C(1)-C(3)   | 1.5326(19) |
| Si(1)-C(16) | 1.9622(14) | C(1)-C(2)   | 1.5332(19) |
| Si(1)-N(1)  | 2.0022(13) | C(1)-C(4)   | 1.5340(19) |
| Si(1)-Si(2) | 2.3378(7)  | C(7)-C(5)   | 1.5350(18) |
| Si(1)-C(9)  | 2.3799(14) | C(8)-C(5)   | 1.5314(18) |
| Si(2)-C(30) | 1.8785(15) | C(9)-C(10)  | 1.4900(17) |
| Si(2)-C(23) | 1.8835(15) | C(10)-C(15) | 1.3915(19) |
| Si(2)-C(36) | 1.8842(15) | C(10)-C(11) | 1.3932(19) |
| N(1)-C(9)   | 1.3033(17) | C(11)-C(12) | 1.3849(19) |
| N(1)-C(1)   | 1.4852(16) | C(12)-C(13) | 1.381(2)   |
| N(2)-C(9)   | 1.3701(16) | C(13)-C(14) | 1.388(2)   |



|                   |            |                   |            |
|-------------------|------------|-------------------|------------|
| C(14)-C(15)       | 1.396(2)   | N(1)-Si(1)-Si(2)  | 105.04(4)  |
| C(16)-C(23)       | 1.3669(19) | Cl(1)-Si(1)-Si(2) | 119.73(3)  |
| C(16)-C(17)       | 1.4885(18) | N(2)-Si(1)-C(9)   | 35.00(5)   |
| C(17)-C(18)       | 1.3992(19) | C(16)-Si(1)-C(9)  | 143.62(5)  |
| C(17)-C(22)       | 1.4037(19) | N(1)-Si(1)-C(9)   | 33.20(5)   |
| C(18)-C(19)       | 1.391(2)   | Cl(1)-Si(1)-C(9)  | 99.85(4)   |
| C(19)-C(20)       | 1.386(2)   | Si(2)-Si(1)-C(9)  | 122.72(4)  |
| C(20)-C(21)       | 1.387(2)   | C(30)-Si(2)-C(23) | 110.41(6)  |
| C(21)-C(22)       | 1.389(2)   | C(30)-Si(2)-C(36) | 109.38(6)  |
| C(23)-C(24)       | 1.4885(18) | C(23)-Si(2)-C(36) | 120.78(6)  |
| C(24)-C(29)       | 1.398(2)   | C(30)-Si(2)-Si(1) | 123.68(5)  |
| C(24)-C(25)       | 1.404(2)   | C(23)-Si(2)-Si(1) | 76.96(5)   |
| C(25)-C(26)       | 1.392(2)   | C(36)-Si(2)-Si(1) | 113.05(5)  |
| C(26)-C(27)       | 1.385(3)   | C(9)-N(1)-C(1)    | 130.13(11) |
| C(27)-C(28)       | 1.380(3)   | C(9)-N(1)-Si(1)   | 89.52(8)   |
| C(28)-C(29)       | 1.397(2)   | C(1)-N(1)-Si(1)   | 139.79(8)  |
| C(30)-C(31)       | 1.400(2)   | C(9)-N(2)-C(5)    | 130.01(10) |
| C(30)-C(35)       | 1.403(2)   | C(9)-N(2)-Si(1)   | 94.84(8)   |
| C(31)-C(32)       | 1.392(2)   | C(5)-N(2)-Si(1)   | 134.61(9)  |
| C(32)-C(33)       | 1.384(2)   | N(1)-C(1)-C(3)    | 110.66(11) |
| C(33)-C(34)       | 1.387(2)   | N(1)-C(1)-C(2)    | 111.18(11) |
| C(34)-C(35)       | 1.389(2)   | C(3)-C(1)-C(2)    | 110.59(11) |
| C(36)-C(41)       | 1.402(2)   | N(1)-C(1)-C(4)    | 106.41(10) |
| C(36)-C(37)       | 1.403(2)   | C(3)-C(1)-C(4)    | 109.57(11) |
| C(37)-C(38)       | 1.391(2)   | C(2)-C(1)-C(4)    | 108.31(12) |
| C(38)-C(39)       | 1.383(2)   | N(1)-C(9)-N(2)    | 107.35(11) |
| C(39)-C(40)       | 1.383(2)   | N(1)-C(9)-C(10)   | 127.07(12) |
| C(40)-C(41)       | 1.391(2)   | N(2)-C(9)-C(10)   | 125.51(12) |
| C(5)-C(6)         | 1.5277(19) | N(1)-C(9)-Si(1)   | 57.27(7)   |
|                   |            | N(2)-C(9)-Si(1)   | 50.16(6)   |
| N(2)-Si(1)-C(16)  | 108.63(6)  | C(10)-C(9)-Si(1)  | 173.36(10) |
| N(2)-Si(1)-N(1)   | 68.16(5)   | C(15)-C(10)-C(11) | 119.92(12) |
| C(16)-Si(1)-N(1)  | 175.10(5)  | C(15)-C(10)-C(9)  | 119.19(12) |
| N(2)-Si(1)-Cl(1)  | 111.64(4)  | C(11)-C(10)-C(9)  | 120.88(12) |
| C(16)-Si(1)-Cl(1) | 97.10(4)   | C(12)-C(11)-C(10) | 119.96(14) |
| N(1)-Si(1)-Cl(1)  | 87.61(4)   | C(13)-C(12)-C(11) | 120.20(14) |
| N(2)-Si(1)-Si(2)  | 127.95(4)  | C(12)-C(13)-C(14) | 120.40(13) |
| C(16)-Si(1)-Si(2) | 73.79(5)   | C(13)-C(14)-C(15) | 119.71(14) |

|                   |            |                   |            |
|-------------------|------------|-------------------|------------|
| C(10)-C(15)-C(14) | 119.78(14) | C(40)-C(41)-C(36) | 121.25(14) |
| C(23)-C(16)-C(17) | 123.69(11) | N(2)-C(5)-C(6)    | 108.48(10) |
| C(23)-C(16)-Si(1) | 104.11(9)  | N(2)-C(5)-C(8)    | 114.64(11) |
| C(17)-C(16)-Si(1) | 132.20(9)  | C(6)-C(5)-C(8)    | 108.34(12) |
| C(18)-C(17)-C(22) | 117.80(12) | N(2)-C(5)-C(7)    | 107.69(10) |
| C(18)-C(17)-C(16) | 122.04(12) | C(6)-C(5)-C(7)    | 110.97(11) |
| C(22)-C(17)-C(16) | 120.14(12) | C(8)-C(5)-C(7)    | 106.74(11) |
| C(19)-C(18)-C(17) | 120.90(13) |                   |            |
| C(20)-C(19)-C(18) | 120.39(14) |                   |            |
| C(19)-C(20)-C(21) | 119.61(14) |                   |            |
| C(20)-C(21)-C(22) | 120.13(14) |                   |            |
| C(21)-C(22)-C(17) | 121.16(13) |                   |            |
| C(16)-C(23)-C(24) | 128.26(12) |                   |            |
| C(16)-C(23)-Si(2) | 105.06(9)  |                   |            |
| C(24)-C(23)-Si(2) | 126.19(10) |                   |            |
| C(29)-C(24)-C(25) | 117.79(13) |                   |            |
| C(29)-C(24)-C(23) | 119.49(13) |                   |            |
| C(25)-C(24)-C(23) | 122.53(13) |                   |            |
| C(26)-C(25)-C(24) | 120.82(15) |                   |            |
| C(27)-C(26)-C(25) | 120.46(16) |                   |            |
| C(28)-C(27)-C(26) | 119.63(14) |                   |            |
| C(27)-C(28)-C(29) | 120.28(16) |                   |            |
| C(28)-C(29)-C(24) | 121.03(15) |                   |            |
| C(31)-C(30)-C(35) | 117.47(13) |                   |            |
| C(31)-C(30)-Si(2) | 123.19(11) |                   |            |
| C(35)-C(30)-Si(2) | 119.18(11) |                   |            |
| C(32)-C(31)-C(30) | 121.09(14) |                   |            |
| C(33)-C(32)-C(31) | 120.27(15) |                   |            |
| C(32)-C(33)-C(34) | 119.79(15) |                   |            |
| C(33)-C(34)-C(35) | 119.87(15) |                   |            |
| C(34)-C(35)-C(30) | 121.48(14) |                   |            |
| C(41)-C(36)-C(37) | 117.09(13) |                   |            |
| C(41)-C(36)-Si(2) | 124.97(11) |                   |            |
| C(37)-C(36)-Si(2) | 117.94(10) |                   |            |
| C(38)-C(37)-C(36) | 121.76(13) |                   |            |
| C(39)-C(38)-C(37) | 119.67(14) |                   |            |
| C(40)-C(39)-C(38) | 119.99(14) |                   |            |
| C(39)-C(40)-C(41) | 120.23(14) |                   |            |

## 5. Computational Methods

Geometry optimizations and vibrational frequencies calculations of LSi-Si(Cl)Ph<sub>2</sub> (**1**) and **2** complexes in singlet and triplet electronic states have been carried out at the BP86-D3(BJ)/Def2TZVPP level in the gas phase.<sup>[6]</sup> All the calculations were carried out using gaussian 16 program package.<sup>[7]</sup> The absence of imaginary frequencies assures the minima on the potential energy surface. We have performed NBO<sup>[8]</sup> calculation using NBO 6.0<sup>[9]</sup> program to estimate natural bond orbitals, partial charges and Wiberg bond indices (WBI).<sup>[10]</sup> The nature of Si<sub>L</sub>-Si bonds in all three complexes was analyzed by energy decomposition analysis (EDA)<sup>[11]</sup> coupled with natural orbital for chemical valence (NOCV)<sup>[12]</sup> using ADF 2018.105 program package.<sup>[13]</sup> EDA-NOCV calculations were carried out at the BP86-D3(BJ)/TZ2P<sup>[14]</sup> level using the geometries optimized at BP86-D3(BJ)/def2-TZVPP level. The EDA-NOCV method involves the decomposition of the intrinsic interaction energy ( $\Delta E_{\text{int}}$ ) between two fragments into four energy components as follows:

$$\Delta E_{\text{int}} = \Delta E_{\text{elstat}} + \Delta E_{\text{Pauli}} + \Delta E_{\text{orb}} + \Delta E_{\text{disp}} \quad (1)$$

where the electrostatic  $\Delta E_{\text{elstat}}$  term is originated from the quasi-classical electrostatic interaction between the unperturbed charge distributions of the prepared fragments, the Pauli repulsion  $\Delta E_{\text{Pauli}}$  (repulsion energy due to the interactions of same spins between the fragments) is the energy change associated with the transformation from the superposition of the unperturbed electron densities of the isolated fragments to the wavefunction, which properly obeys the Pauli principle through explicit anti-symmetrisation and renormalization of the production of the wavefunction. Dispersion interaction,  $\Delta E_{\text{disp}}$  (equivalent to attractive forces due to instantaneous fluctuation of electron clouds in the fragment before and after the bond formation) is also obtained as we used D3(BJ). The orbital term  $\Delta E_{\text{orb}}$  comes from (constructive interference during spatial mixing of orbitals of the fragments) the mixing of orbitals, charge transfer and polarization between the isolated fragments. This can be further divided into contributions from each irreducible representation of the point group of an interacting system as follows:

$$\Delta E_{\text{orb}} = \sum_r \Delta E_r \quad (2)$$

The combined EDA-NOCV method is able to partition the total orbital interactions into pairwise contributions of the orbital interactions which are important in providing a complete picture of the bonding. The charge deformation  $\Delta\rho_k(r)$ , which comes from the mixing of the

orbital pairs  $\psi_k(r)$  and  $\psi_{-k}(r)$  of the interacting fragments, gives the magnitude and the shape of the charge flow due to the orbital interactions (Equation 3), and the associated orbital energy  $\Delta E_{orb}$  presents the amount of orbital energy coming from such interaction (Equation 4).

$$\Delta\rho_{orb}(r) = \sum_k \Delta\rho_k(r) = \sum_{k=1}^{N/2} v_k [-\psi_{-k}^2(r) + \psi_k^2(r)] \quad (3)$$

$$\Delta E_{Orb} = \sum_k \Delta E_{Orb}^k = \sum_k v_k [-F_{-k,-k}^{TS} + F_{k,k}^{TS}] \quad (4)$$

Readers are further referred to the recent review articles to know more about the EDA-NOCV method and its application. <sup>[15]</sup> Also, a very recent report related to equation (1) has been critically discussed by different researchers. <sup>[16]</sup>

## Optimized coordinates

### Compound 1

|    |              |              |              |    |              |             |              |
|----|--------------|--------------|--------------|----|--------------|-------------|--------------|
| Si | 14.487402000 | 6.883366000  | 13.376831000 | C  | 10.079828000 | 6.125516000 | 8.425732000  |
| N  | 12.804119000 | 7.411139000  | 12.673371000 | H  | 9.367242000  | 6.026873000 | 7.605884000  |
| C  | 11.836647000 | 8.478770000  | 12.975783000 | C  | 11.089335000 | 7.090634000 | 8.362826000  |
| C  | 12.063526000 | 9.672710000  | 12.030045000 | H  | 11.169662000 | 7.743858000 | 7.493061000  |
| H  | 11.839833000 | 9.396727000  | 10.991287000 | C  | 12.000755000 | 7.218722000 | 9.412848000  |
| H  | 13.107507000 | 10.011308000 | 12.087060000 | H  | 12.797201000 | 7.961663000 | 9.363396000  |
| H  | 11.408657000 | 10.511230000 | 12.308110000 | Cl | 11.637395000 | 4.543409000 | 14.223884000 |
| C  | 10.387635000 | 7.975704000  | 12.873200000 | Si | 13.478939000 | 5.334587000 | 14.911219000 |
| H  | 10.104443000 | 7.753671000  | 11.837381000 | C  | 13.122536000 | 6.149691000 | 16.568874000 |
| H  | 9.705112000  | 8.749318000  | 13.252859000 | C  | 14.054383000 | 7.080707000 | 17.067461000 |
| H  | 10.256934000 | 7.066980000  | 13.475370000 | H  | 14.945094000 | 7.323978000 | 16.481906000 |
| C  | 12.118577000 | 8.908466000  | 14.422792000 | C  | 13.847999000 | 7.720526000 | 18.291772000 |
| H  | 13.175287000 | 9.192609000  | 14.545289000 | H  | 14.581120000 | 8.439784000 | 18.660862000 |
| H  | 11.897247000 | 8.095136000  | 15.125896000 | C  | 12.696406000 | 7.447851000 | 19.036162000 |
| H  | 11.500435000 | 9.775788000  | 14.690294000 | H  | 12.528765000 | 7.951581000 | 19.989424000 |
| N  | 13.987312000 | 5.813200000  | 11.885157000 | C  | 11.757251000 | 6.532095000 | 18.551333000 |
| C  | 14.623440000 | 4.745630000  | 11.092593000 | H  | 10.855366000 | 6.318797000 | 19.127923000 |
| C  | 13.750168000 | 3.479398000  | 11.097929000 | C  | 11.970250000 | 5.887911000 | 17.330044000 |
| H  | 12.806206000 | 3.645273000  | 10.564123000 | H  | 11.229787000 | 5.178229000 | 16.956795000 |
| H  | 13.522162000 | 3.178890000  | 12.128328000 | C  | 14.617301000 | 3.856799000 | 15.158721000 |
| H  | 14.282645000 | 2.654448000  | 10.603242000 | C  | 14.270271000 | 2.536758000 | 14.825893000 |
| C  | 14.885649000 | 5.214932000  | 9.650679000  | H  | 13.258854000 | 2.319841000 | 14.477819000 |
| H  | 15.455864000 | 4.448716000  | 9.106118000  | C  | 15.202341000 | 1.500866000 | 14.933666000 |
| H  | 15.470446000 | 6.145643000  | 9.652332000  | H  | 14.914278000 | 0.481924000 | 14.668887000 |
| H  | 13.949061000 | 5.390163000  | 9.107063000  | C  | 16.500265000 | 1.767168000 | 15.378889000 |
| C  | 15.962287000 | 4.438783000  | 11.779207000 | H  | 17.229192000 | 0.959315000 | 15.459065000 |
| H  | 16.496957000 | 3.654632000  | 11.226805000 | C  | 16.860474000 | 3.074270000 | 15.723147000 |
| H  | 15.804876000 | 4.083261000  | 12.806360000 | H  | 17.871206000 | 3.289040000 | 16.074164000 |
| H  | 16.597935000 | 5.335403000  | 11.811983000 | C  | 15.927852000 | 4.107077000 | 15.611756000 |
| C  | 12.861479000 | 6.522819000  | 11.661252000 | H  | 16.228616000 | 5.124811000 | 15.873125000 |
| C  | 11.908245000 | 6.381224000  | 10.534241000 |    |              |             |              |
| C  | 10.895182000 | 5.412616000  | 10.591990000 |    |              |             |              |
| H  | 10.821536000 | 4.777769000  | 11.474843000 |    |              |             |              |
| C  | 9.985302000  | 5.287343000  | 9.540917000  |    |              |             |              |
| H  | 9.197104000  | 4.535443000  | 9.595445000  |    |              |             |              |

### Compound 2

|    |              |              |              |   |              |              |              |
|----|--------------|--------------|--------------|---|--------------|--------------|--------------|
| Cl | 8.223945000  | 10.835352000 | 13.760381000 | H | 10.970279000 | 5.366442000  | 17.340682000 |
| Si | 7.031568000  | 9.340427000  | 12.843446000 | C | 10.758957000 | 6.511037000  | 15.536719000 |
| Si | 7.468024000  | 7.056354000  | 13.097125000 | H | 11.780678000 | 6.871770000  | 15.551599000 |
| N  | 5.592164000  | 9.690077000  | 14.176718000 | C | 9.906232000  | 6.892895000  | 14.513103000 |
| N  | 5.492586000  | 9.966616000  | 12.054137000 | H | 10.271124000 | 7.554830000  | 13.735249000 |
| C  | 5.386085000  | 9.621062000  | 15.622717000 | C | 6.059974000  | 5.840075000  | 12.840733000 |
| C  | 5.361017000  | 9.095568000  | 9.790728000  | C | 4.794483000  | 6.314606000  | 12.490528000 |
| H  | 5.223850000  | 9.356503000  | 8.740023000  | H | 4.640731000  | 7.383792000  | 12.397589000 |
| H  | 4.648475000  | 8.309172000  | 10.047376000 | C | 3.740278000  | 5.447353000  | 12.247176000 |
| H  | 6.362694000  | 8.694419000  | 9.916329000  | H | 2.766052000  | 5.837148000  | 11.973751000 |
| C  | 3.685276000  | 10.755401000 | 10.479917000 | C | 3.935179000  | 4.077637000  | 12.348889000 |
| H  | 3.552750000  | 10.976801000 | 9.419622000  | H | 3.114896000  | 3.395534000  | 12.159322000 |
| H  | 3.436091000  | 11.654833000 | 11.040285000 | C | 5.185776000  | 3.583795000  | 12.692853000 |
| H  | 2.977360000  | 9.972187000  | 10.746163000 | H | 5.343353000  | 2.514355000  | 12.770418000 |
| C  | 4.800388000  | 10.055010000 | 13.211375000 | C | 6.234973000  | 4.457169000  | 12.938110000 |
| C  | 3.386477000  | 10.464671000 | 13.367502000 | H | 7.206577000  | 4.056735000  | 13.206781000 |
| C  | 2.366583000  | 9.528896000  | 13.240430000 | C | 5.487473000  | 11.023960000 | 16.220665000 |
| H  | 2.609288000  | 8.498954000  | 13.008911000 | H | 5.428755000  | 10.969374000 | 17.309690000 |
| C  | 1.048635000  | 9.909795000  | 13.425276000 | H | 4.670967000  | 11.656637000 | 15.870967000 |
| H  | 0.258305000  | 9.175586000  | 13.329101000 | H | 6.434634000  | 11.486606000 | 15.944106000 |
| C  | 0.741620000  | 11.227190000 | 13.736319000 | C | 6.506186000  | 8.752593000  | 16.184174000 |
| H  | -0.289798000 | 11.524058000 | 13.880903000 | H | 6.460222000  | 8.753979000  | 17.274165000 |
| C  | 4.054502000  | 8.981403000  | 16.010806000 | H | 7.486735000  | 9.118464000  | 15.880935000 |
| H  | 4.057717000  | 8.788524000  | 17.085422000 | H | 6.405417000  | 7.721442000  | 15.846404000 |
| H  | 3.920996000  | 8.027458000  | 15.496681000 | C | 5.134070000  | 10.323043000 | 10.669733000 |
| H  | 3.202023000  | 9.621034000  | 15.790514000 | C | 6.026020000  | 11.484965000 | 10.238255000 |
| C  | 1.757949000  | 12.161999000 | 13.863822000 | H | 5.830255000  | 11.744082000 | 9.196069000  |
| H  | 1.523455000  | 13.191202000 | 14.105906000 | H | 7.081464000  | 11.240780000 | 10.329509000 |
| C  | 3.078719000  | 11.782093000 | 13.681956000 | H | 5.822230000  | 12.361605000 | 10.85643800  |
| H  | 3.875552000  | 12.509898000 | 13.775097000 |   |              |              |              |
| C  | 8.273815000  | 8.861954000  | 11.413248000 |   |              |              |              |
| C  | 8.926312000  | 9.634948000  | 10.340352000 |   |              |              |              |
| C  | 9.632967000  | 10.809241000 | 10.608869000 |   |              |              |              |
| H  | 9.715054000  | 11.152016000 | 11.631183000 |   |              |              |              |
| C  | 10.227178000 | 11.529928000 | 9.584612000  |   |              |              |              |
| H  | 10.777148000 | 12.434120000 | 9.817979000  |   |              |              |              |
| C  | 10.116558000 | 11.104627000 | 8.269272000  |   |              |              |              |
| H  | 10.574368000 | 11.674127000 | 7.469499000  |   |              |              |              |
| C  | 9.416031000  | 9.940067000  | 7.987734000  |   |              |              |              |
| H  | 9.326729000  | 9.592748000  | 6.965120000  |   |              |              |              |
| C  | 8.836421000  | 9.210984000  | 9.011136000  |   |              |              |              |
| H  | 8.306838000  | 8.293983000  | 8.784421000  |   |              |              |              |
| C  | 8.477256000  | 7.527192000  | 11.589091000 |   |              |              |              |
| C  | 9.399958000  | 6.654910000  | 10.849002000 |   |              |              |              |
| C  | 10.715003000 | 7.036232000  | 10.574428000 |   |              |              |              |
| H  | 11.058989000 | 8.013553000  | 10.888912000 |   |              |              |              |
| C  | 11.575772000 | 6.179660000  | 9.909851000  |   |              |              |              |
| H  | 12.594428000 | 6.491572000  | 9.711629000  |   |              |              |              |
| C  | 11.139252000 | 4.928653000  | 9.495755000  |   |              |              |              |
| H  | 11.813262000 | 4.261636000  | 8.971985000  |   |              |              |              |
| C  | 9.836663000  | 4.535687000  | 9.765739000  |   |              |              |              |
| H  | 9.487208000  | 3.559139000  | 9.451779000  |   |              |              |              |
| C  | 8.980402000  | 5.385528000  | 10.447228000 |   |              |              |              |
| H  | 7.965646000  | 5.072062000  | 10.664865000 |   |              |              |              |
| C  | 8.585523000  | 6.439499000  | 14.467544000 |   |              |              |              |
| C  | 8.147149000  | 5.591680000  | 15.486487000 |   |              |              |              |
| H  | 7.126330000  | 5.224861000  | 15.479944000 |   |              |              |              |
| C  | 8.995990000  | 5.207695000  | 16.513640000 |   |              |              |              |
| H  | 8.636014000  | 4.548272000  | 17.294855000 |   |              |              |              |
| C  | 10.304799000 | 5.666813000  | 16.539969000 |   |              |              |              |

## 6. References

- [1] S. S. Sen, H. W. Roesky, D. Stern, J. Henn and D. Stalke, *J. Am. Chem. Soc.* 2010, **132** (3), 1123–1126.
- [2] Bruker AXS Inc., in Bruker Apex CCD, SAINT v8.40B (Ed.: Bruker AXS Inst. Inc.), WI, USA, Madison, **2019**.
- [3] L. Krause, R. Herbst-Irmer, G. M. Sheldrick and D. Stalke, *J. Appl. Crystallogr.* 2015, **48**, 3-10.
- [4] G. M. Sheldrick, *Acta Crystallogr.* 2015, **A71**, 3-8.
- [5] C. B. Hübschle, G. M. Sheldrick, B. Dittrich, *J. Appl. Cryst.*, 2011, **44**, 1281-1284.
- [6] (a) A. D. Becke, *Phys. Rev. A* 1988, **38**, 3098; (b) J. P. Perdew, *Phys. Rev. B* 1986, **33**, 8822. (c) S. Grimme, S. Ehrlich, and L. Goerigk, *J. Comput. Chem.* 2011, **32**, 1456; (d) S. Grimme, J. Antony, S. Ehrlich, H. Krieg, *J. Chem. Phys.* 2010, **132**, 154104; (e) F. Weigend, and R. Ahlrichs, *Phys. Chem. Chem. Phys.* 2005, **7**, 3297; (f) F. Weigend, *Phys. Chem. Chem. Phys.* 2006, **8**, 1057.
- [7] *Gaussian 16, Revision A.03*, M. J. Frisch, et al. Gaussian, Inc., Wallingford CT. 2016.
- [8] a) F. Weinhold, C. Landis, *Valency and Bonding, A Natural Bond Orbital Donor – Acceptor Perspective*, Cambridge University Press, Cambridge, 2005; b) C. R. Landis and F. Weinhold, "The NBO View of Chemical Bonding", in, G. Frenking and S. Shaik (eds.), *The Chemical Bond: Fundamental Aspects of Chemical Bonding*. Wiley, 2014, pp. 91-120.
- [9] K. B. Wiberg, *Tetrahedron* 1968, **24**, 1083.
- [10] E. D. Glendening, C. R. Landis, F. Weinhold, *J. Comput. Chem.* 2013, **34**, 1429.
- [11] T. Ziegler, A. Rauk, *Theor. Chim. Acta*, 1977, **46**, 1.
- [12] (a) M. Mitoraj, and A. Michalak, *Organometallics* 2007, **26**, 6576; (b) M. Mitoraj, A. Michalak, *J. Mol. Model.* 2008, **14**, 681.
- [13] (a) *ADF2017*, SCM, Theoretical Chemistry, Vrije Universiteit, Amsterdam, The Netherlands, <http://www.scm.com>; (b) G. te Velde, F.M. Bickelhaupt, E. J. Baerends, C. F. Guerra, S. J. A. van Gisbergen, J. G. Snijders, T. Ziegler, *J. Comput. Chem.* 2001, **22**, 931.
- [14] (a) E. van Lenthe, and E. J. Baerends, *J. Comput. Chem.* 2003, **24**, 1142; (b) E. van Lenthe, E. J. Baerends, and J. G. Snijders, *J. Chem. Phys.* 1993, **99**, 4597; (c) E. van Lenthe, E. J. Baerends, J. G. Snijders, *J. Chem. Phys.* 1994, **101**, 9783.
- [15] (a) G. Frenking, F. M. Bickelhaupt, *The Chemical Bond 1. Fundamental Aspects of Chemical Bonding*, chap. The EDA Perspective of Chemical Bonding, 121. Wiley-VCH:

Weinheim, 2014; (b) L. Zhao, M. von Hopffgarten, D. M. Andrada, and G. Frenking, *WIREs Comput. Mol. Sci.* 2018, **8**, 1345; (c) L. Zhao, M. Hermann, W. H. E. Schwarz, and G. Frenking, *Nat. Rev. Chem.* 2019, **3**, 48; (d) W. Yang, K. E. Krantz, L. A. Freeman, D. Dickie, A. Molino, G. Frenking, S. Pan, D. J. D. Wilson, and R. J. Gilliard Jr., *Angew. Chem. Int. Ed.*, 2020, **59**, 3850; (e) G. Deng, S. Pan, G. Wang, L. Zhao, M. Zhou, G. Frenking, *Angew. Chem. Int. Ed.*, 2020, **59**, 10603; (f) S. Pan, G. Frenking, *Angew. Chem. Int. Ed.*, 2020, **59**, 8756; (g) L. Zhao, S. Pan, M. Zhou, G. Frenking, *Science*, 2019, **365**, 5021; (h) R. Saha, S. Pan, P. K. Chattaraj, and G. Merino, *Dalton Trans.* 2020, **49**, 1056.

[16] J. Andrés, P. W. Ayers, R. A. Boto, R. Carbó-Dorca, H. Chermette, J. Cioslowski, J. Contreras-García, D. L. Cooper, G. Frenking, C. Gatti, F. Heidar-Zadeh, L. Joubert, A. Martín Pendás, E. Matito, I. Mayer, A. J. Misquitta, Y. Mo, J. Pilmé, P. L. A. Popelier, M. Rahm, E. Ramos-Cordoba, P. Salvador, W. H. E. Schwarz, S. Shahbazian, B. Silvi, M. Solà, K. Szalewicz, V. Tognetti, F. Weinhold, and E. L. Zins, *J. Comput. Chem.* 2019, **40**, 2248.
